# Supplementary material for: X-ray absorption near-edge spectroscopy of antimony complexed with organic molecules: a theoretical interpretation
Source: Royal Society of Chemistry journal article supplement (doi:10.1039/d1ja00319d), 2022-01-01
Supplement: d1ja00319d1.pdf [file d1ja00319d1.pdf]

## Electronic Supplementary Information

1

2

3

4 X-ray absorption near-edge spectroscopy of antimony complexed with  
5 organic molecules: A theoretical interpretation

6

7 Haoze Chen<sup>a,b</sup>, Wen Zhong<sup>a,b</sup>, Chuanyong Jing<sup>a,b,\*</sup>

8

9

10 <sup>a</sup> State Key Laboratory of Environmental Chemistry and Ecotoxicology, Research  
11 Center for Eco-Environmental Sciences, Chinese Academy of Sciences, Beijing  
12 100085, China

13 <sup>b</sup> University of Chinese Academy of Sciences, Beijing 100049, China

14

15 Tel: +86 10 6284 9523; Fax: +86 10 6284 9523

16 \*E-mail: cyjing@rcees.ac.cn

17

18

19

20

22 **Note S1** Species validation.

23 The existence of the  $\text{Sb}_2(\text{tar})_2^{2-}$  and  $\text{Sb}(\text{EDTA})^-$  species in aqueous solution was  
24 evidenced by comprehensive analysis in our previous work<sup>1</sup>. Fourier transform ion  
25 cyclotron resonance mass spectrometry (FT-ICR MS) analysis resolved  $\text{C}_8\text{H}_4\text{NaO}_{12}\text{Sb}_2^-$   
26 ( $\text{Sb}_2\text{tar}_2\text{Na}^-$ ) at  $m/z$  556.76801, 558.76849 and 560.76862. The  $\text{Sb}(\text{EDTA})^-$  was  
27 resolved at  $m/z$  408.96378 and 410.96416. The structures of  $\text{Sb}_2(\text{tar})_2^{2-}$  and  $\text{Sb}(\text{EDTA})^-$   
28 in solution were also verified through XANES simulation with FPMXAN codes using  
29 DFT optimized structures.

30

31 **Note S2** Details for the TDDFT calculation.

32 (1) Computational details

33 Three types of functionals including B3LYP, B2GP-PLYP (in  $\omega$ B2GP-PLYP version),  
34 and M062X were examined. The excited-state calculation was performed using the  
35 converged restricted Kohn–Sham wave functions. Scalar relativistic effects of all atoms  
36 were treated on the basis of the second order Douglas–Kroll–Hess (DKH2) methods<sup>2</sup>.  
37 The adapted versions of the def2 basis sets as DKH-def2-TZVP were used to describe  
38 the C, H, O, N atoms. The segmented all-electron relativistically contracted basis sets,  
39 SARC-def2-TZVP basis set was used to treat the Sb atoms to correspond to the DKH2  
40 Hamiltonians applied. In order to accelerate the calculation, the RIJCOSX method<sup>3</sup> was  
41 employed. The auxiliary basis set of def2-TZVP/C and SARC/J were selected to adapt  
42 the RIJCOSX method.

43 In TDDFT calculation, the triplet excitation and TDA approximation<sup>4</sup> was forbidden.

44 The orbital window was set to enable the core electron from all Sb 1s orbitals excited  
45 to all unoccupied orbitals with other occupied orbitals fixed. In MP2 calculation from  
46  $\omega$ B2GP-PLYP cases, the “relaxed” density incorporated orbital relaxation to correct the

47 transition energy. The root number of excitation states for  $\text{Sb}_2(\text{tar})_2^{2-}$  complex and  
48  $\text{Sb}(\text{EDTA})^-$  complex were 150 and 60 to calculate the region in the first 20 eV range  
49 from the transition threshold. To explore the validity of methodology to broader regions  
50 (70-80 eV at post-edge), the root number were increased to 600 and 300 at  
51 M062X/DKH-def2-TZVP level, respectively.

52 The orbital component of MOs and NTOs were analyzed based on modified Mulliken  
53 atom population defined by Ros & Schuit (SCPA) method and Hirshfeld method  
54 embedded in Multiwfn package. Only the half of the NTOs for  $\text{Sb}_2(\text{tar})_2^{2-}$  complex were  
55 analyzed due to the degeneracy of the transition energy. The electron-hole analysis was  
56 used to supplement the transition information in complementary with the NTO result.

## 57 (2) Data processing

58 Theoretical spectra were produced with the `orca_mapspc` utility program of the ORCA  
59 package. A constant Gaussian broadening of 0.1 and 8.0 eV was applied to the  
60 calculated transitions for Sb K-edge XAS spectra. The broadening with 0.1 eV  
61 permitted to specify the distribution of the transitions, while the broadening with 8.0  
62 eV exactly met the FWHM of the experimental spectrum. Empirical energy shifts were  
63 applied to the calculated spectra to match the K-edge XAS spectra to align the position  
64 of the peak maximum of the white-line. The ground-state molecular orbitals (MOs) and  
65 output NTOs were visualized by VMD and VESTA software.

66

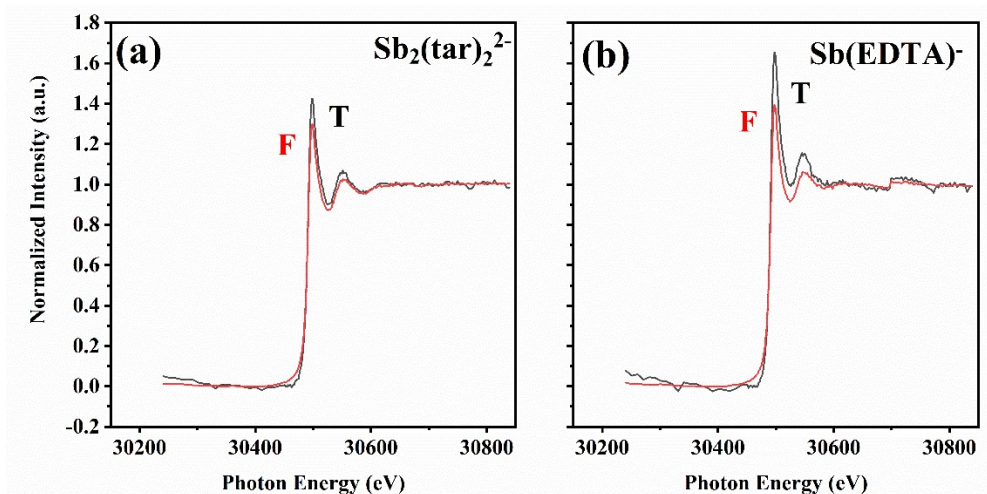

67  
 68 **Figure S1** The complete X-ray absorption spectrum of the solution of (a)  $\text{Sb}_2(\text{tar})_2^{2-}$   
 69 and (b)  $\text{Sb}(\text{EDTA})^-$  under transmission mode (T) and fluorescence mode (F).

70

71

72

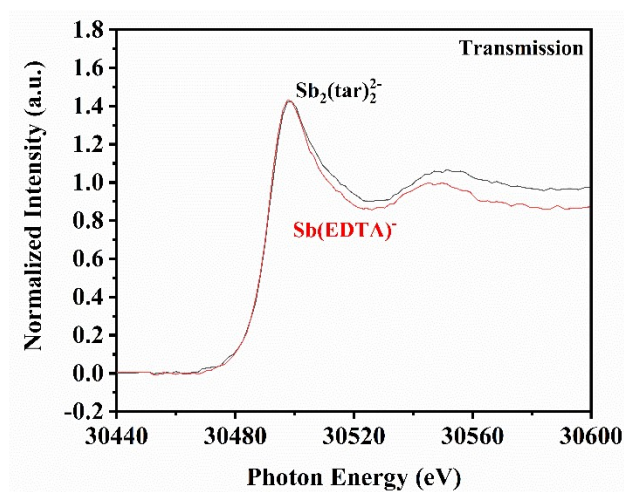

73

74 **Figure S2** The comparison of the XANES region of  $\text{Sb}_2(\text{tar})_2^{2-}$  and  $\text{Sb}(\text{EDTA})^-$  under  
 75 transmission mode.

76

77

78

79

80 **Table S1** Transition oscillator strength for  $\text{Sb}_2(\text{tar})_2^{2-}$  complex

| State* | Excitation energy<br>(eV)** | Transition oscillator<br>strength (*10 <sup>3</sup> ) | Normalized calculated<br>intensity |
|--------|-----------------------------|-------------------------------------------------------|------------------------------------|
| S1     | 30483.311                   | 39.5                                                  | 0.83                               |
| S2     | 30483.311                   | 31.4                                                  | 0.83                               |
| S3     | 30483.972                   | 23.1                                                  | 0.43                               |
| S4     | 30483.972                   | 20.5                                                  | 0.43                               |
| S5     | 30485.873                   | 51.6                                                  | 1.00                               |
| S6     | 30485.873                   | 48.7                                                  | 1.00                               |
| S13    | 30491.066                   | 11.4                                                  | 0.20                               |
| S14    | 30491.066                   | 11.8                                                  | 0.20                               |
| S23    | 30492.797                   | 9.0                                                   | 0.22                               |
| S24    | 30492.797                   | 8.9                                                   | 0.22                               |

81 \* The excited states with transition oscillator strength higher than 0.005 were listed.

82 \*\* The energy indicated the unshifted excitation energy.

83

84

85 **Table S2** Transition oscillator strength for  $\text{Sb}(\text{EDTA})^-$  complex

| States | Excitation energy<br>(eV)* | Transition oscillator<br>strength (*10 <sup>3</sup> ) | Normalized calculated<br>intensity |
|--------|----------------------------|-------------------------------------------------------|------------------------------------|
| S1     | 30483.450                  | 0.7                                                   | 0.02                               |
| S2     | 30484.117                  | 14.4                                                  | 0.94                               |
| S3     | 30484.509                  | 14.6                                                  | 1.00                               |
| S17    | 30493.003                  | 1.0                                                   | 0.07                               |
| S18    | 30493.401                  | 1.0                                                   | 0.07                               |

86 \* The excited states with transition oscillator strength higher than 0.001 were listed  
87 except for S1.

88 \*\* The energy indicated the unshifted excitation energy.

89

90

91

92 **Note S3** Transition components (contribution from the molecular orbital pairs) of the  
 93 theoretical XANES calculation for  $\text{Sb}_2(\text{tar})_2^{2-}$  complex. The weights of the individual  
 94 excitations are omitted if less than 0.05. The unoccupied molecular orbitals highlighted  
 95 ( $> 0.20$ ) were plotted in **Figure S3**. The contribution of the atomic groups to MOs were  
 96 listed in **Table S3** and **Table S4**.

97 STATE 1: E= 30483.311 eV

98       **1a** → **126a** :       **0.404701**       **1a** → **127a** :       **0.374568**

99 STATE 2: E= 30483.311 eV

100       **0a** → **126a** :       **0.404647**       **0a** → **127a** :       **0.374619**

101 STATE 3: E= 30483.972 eV

102       0a → 126a :       0.071698       0a → 127a :       0.062177

103       **0a** → **128a** :       **0.361765**       **0a** → **129a** :       **0.343597**

104 STATE 4: E= 30483.972 eV

105       1a → 126a :       0.071681       1a → 127a :       0.062192

106       **1a** → **128a** :       **0.361711**       **1a** → **129a** :       **0.343645**

107 STATE 5: E= 30485.873 eV

108       **1a** → **130a** :       **0.273558**       1a → 131a :       0.129692

109       1a → 134a :       0.090587       1a → 135a :       0.095585

110       1a → 139a :       0.063040

111 STATE 6: E= 30485.873 eV

112       **0a** → **130a** :       **0.273571**       0a → 131a :       0.129640

113       0a → 134a :       0.090669       0a → 135a :       0.095523

114       0a → 139a :       0.063055

115 STATE 13: E= 30491.066 eV

116       **0a** → **131a** :       **0.213207**       0a → 132a :       0.107239

117 0a → 138a : 0.110718 0a → 139a : 0.069166

118 STATE 14: E= 30491.066 eV

119 **1a → 131a : 0.213178** 1a → 132a : 0.107320

120 1a → 138a : 0.110770 1a → 139a : 0.069163

121 STATE 23: E= 30492.797 eV

122 1a → 134a : 0.138422 1a → 135a : 0.151129

123 1a → 149a : 0.095934 1a → 150a : 0.065856

124 1a → 156a : 0.103938 1a → 157a : 0.052389

125 STATE 24: E= 30492.797 eV

126 0a → 134a : 0.138400 0a → 135a : 0.151124

127 0a → 149a : 0.095642 0a → 150a : 0.066224

128 0a → 156a : 0.104051 0a → 157a : 0.052382

129

130 **Note S4** Transition components (contribution from the molecular orbital pairs) of the  
131 theoretical XANES calculation for Sb(EDTA)<sup>-</sup> complex. The weights of the individual  
132 excitations are omitted if less than 0.05. The unoccupied molecular orbitals highlighted  
133 (> 0.20) were plotted in **Figure S4** and **Figure S5** from different perspective. The  
134 contribution of the atomic groups to MOs were listed in **Table S5** and **Table S6**.

135 STATE 1: E= 30483.450 eV

136 **0a → 101a : 0.538860** **0a → 102a : 0.358450**

137 STATE 2: E= 30484.117 eV

138 **0a → 103a : 0.564567** 0a → 105a : 0.106125

139 0a → 107a : 0.071666 0a → 109a : 0.138521

140 STATE 3: E= 30484.509 eV

141 0a → 103a : 0.137737 0a → 104a : 0.051010

142 0a → 105a : 0.102413 0a → 107a : **0.505774**

143 STATE 17: E= 30493.003 eV

144 0a → 110a : 0.056236 0a → 113a : 0.140613

145 **0a → 115a : 0.215337** 0a → 119a : 0.131939

146 0a → 120a : 0.094015 0a → 135a : 0.051375

147 STATE 18: E= 30493.401 eV

148 0a → 113a : 0.055548 **0a → 115a : 0.416822**

149 0a → 117a : 0.090901 0a → 129a : 0.050291

150 0a → 140a : 0.052805

151

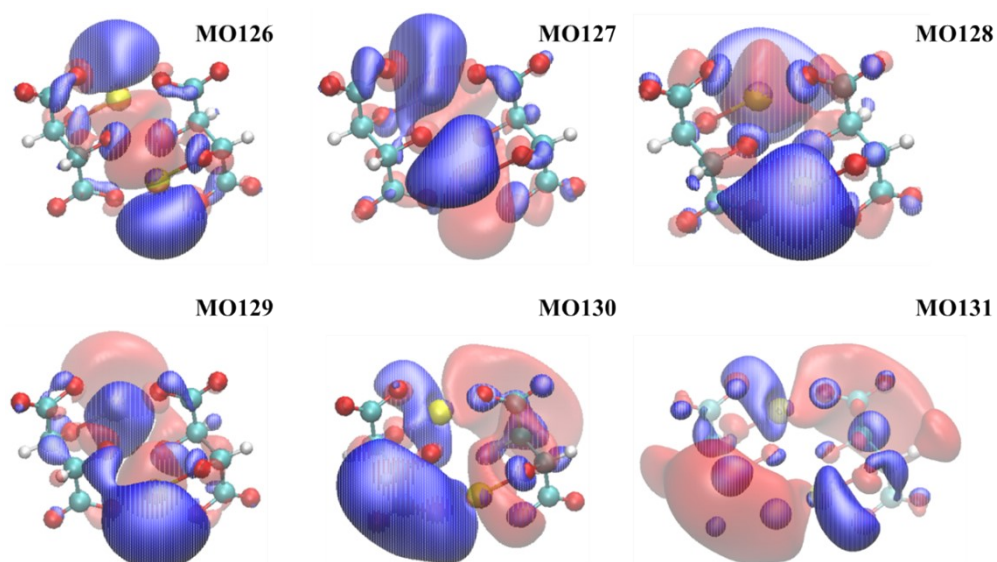

152

153 **Figure S3** Frontier unoccupied molecular orbital for  $\text{Sb}_2(\text{tar})_2^{2-}$  complex (top view).

154



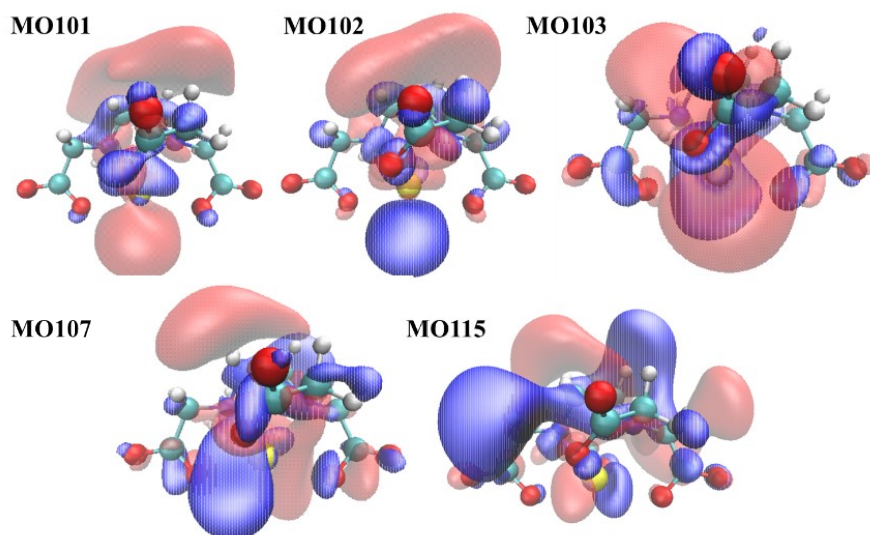

155

156 **Figure S4** Frontier unoccupied molecular orbital for Sb(EDTA)<sup>-</sup> complex (front view).

157

158

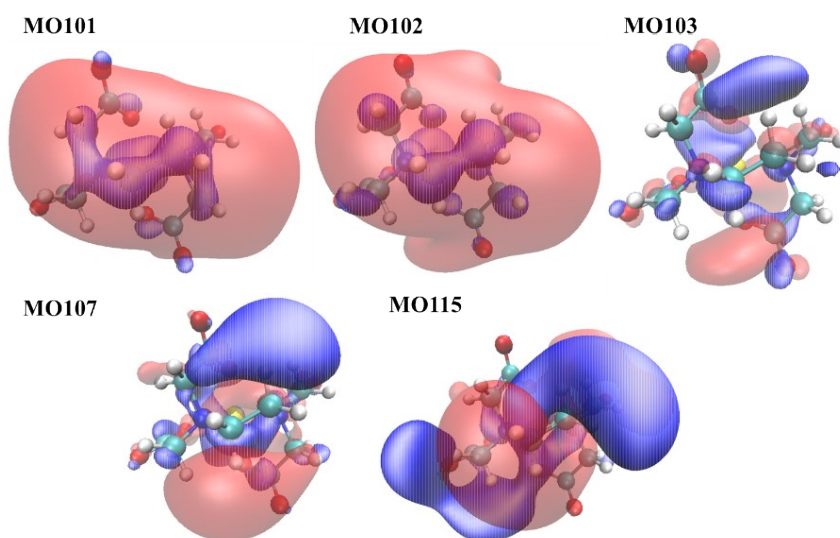

159

160 **Figure S5** Frontier unoccupied molecular orbital for Sb(EDTA)<sup>-</sup> complex (top view).

161

162 **Note S5** Description for the frontier molecular orbital shown in **Figure S3**.

163 MO126 is the LUMO of Sb<sub>2</sub>(tar)<sub>2</sub><sup>2-</sup> complex which consisted of major antiparallel *p*

164 orbitals. Minor contribution was from nearby deprotonated hydroxyl group and carbon

165 chain. MO127 possessed energy level close to MO126, but the *p* orbitals are parallel in

166 another direction. The  $p$  orbitals in MO126 and MO127 are vertical to Sb-O bonds.  
167 MO126 and MO127 majorly contributes to the S1 states. However, in MO128 and  
168 MO129, antimony centers connect to nearby coordinated oxygens with  $sp^3$  hybrid  
169 orbitals. The nodes between antimony and oxygen can be observed. The characteristic  
170 can be summarized as  $\sigma^*$  orbitals. Based on the bimetallic nature, two similar  $\sigma^*$   
171 orbitals can be observed in one molecule. In MO128, the two orbitals are antiparallel,  
172 while in MO129, they are parallel in another direction. In the cases of MO130 and  
173 MO131, the  $p$  orbitals contributed less to the molecular orbitals. The  $p$  orbitals formed  
174 nodes with all coordinated oxygen atoms. This feature can be summarized as another  
175 type of  $\sigma^*$ . All mentioned orbitals were responsible for the transitions in the major peaks  
176 of the white-line.

177

178 **Note S6** Description for the frontier molecular orbital shown in **Figure S4 and S5**.

179 The contribution of antimony to the molecular orbital in  $\text{Sb}(\text{EDTA})^-$  complex was  
180 smaller than that in  $\text{Sb}_2(\text{tar})_2^{2-}$  complex. In most cases, the major contribution to the  
181 molecular orbital was attributed to the carbon chains between two tertiary nitrogen  
182 atoms, critically, to only the carbon atoms. Although contribution of antimony is small,  
183 the  $p$  orbitals for antimony still can be visualized in **Figure S4**. MO101 is the LUMO  
184 of  $\text{Sb}(\text{EDTA})^-$  complex. In MO101 and MO102, the 2s orbitals in noncarboxylic carbon  
185 atoms formed bonding orbitals. Then the group orbital interacts with the vertical  $p$   
186 orbital from antimony. In other cases, it's hard to specify the nature of molecular  
187 orbitals.

188 **Table S3** Composition of the molecular orbital for  $\text{Sb}_2(\text{tar})_2^{2-}$  complex shown in **Figure S3** (SCPA)

|        | E (eV)*   | Sb    |       | Coordinated atom    |                    |                     | $\text{C}_\alpha\text{H}^{**}$ |      | $\text{C}_\beta\text{OO}$ | Major component                                                   |
|--------|-----------|-------|-------|---------------------|--------------------|---------------------|--------------------------------|------|---------------------------|-------------------------------------------------------------------|
|        |           | Sb%   | Sb p% | $\text{O}_\alpha\%$ | $\text{O}_\beta\%$ | $\text{O}_\beta$ s% | tot%                           | s %  | tot%                      |                                                                   |
| MO-0   | -30486.17 | 100.0 | 0.0   |                     |                    |                     |                                |      |                           | Sb 1s                                                             |
| MO-126 | 7.34      | 45.8  | 38.4  | 13.1                | 3.1                | 1.4                 | 35.2                           | 23.0 | 6.0                       | Sb 5p + $\text{O}_\alpha\text{C}_\alpha\text{H}$ (s)              |
| MO-127 | 7.48      | 49.5  | 46.5  | 5.2                 | 13.2               | 6.9                 | 22.4                           | 19.7 | 22.9                      | Sb 5p + $\text{C}_\alpha\text{H}$ (s) + $\text{C}_\beta\text{OO}$ |
| MO-128 | 8.05      | 50.7  | 33.8  | 6.0                 | 6.8                |                     | 31.0                           | 15.0 | 12.3                      | Sb + $\text{C}_\alpha\text{H}$                                    |
| MO-129 | 8.23      | 53.9  | 31.0  | 7.2                 | 2.3                |                     | 35.0                           | 30.4 | 4.0                       | Sb + $\text{C}_\alpha\text{H}$ (s)                                |
| MO-130 | 8.78      | 15.7  | 14.0  | 6.7                 | 3.8                | 3.3                 | 61.0                           | 52.0 | 16.7                      | $\text{C}_\alpha\text{H}$ (s)                                     |
| MO-131 | 9.15      | 7.7   | 6.7   | 0.7                 | 1.2                |                     | 84.5                           | 70.1 | 7.1                       | $\text{C}_\alpha\text{H}$ (s)                                     |

189 \* The energy indicated the eigenvalues of the Kohn-Sham equation.

190 \*\* The species  $\text{C}_\alpha\text{H}$  indicated the hydrocarbon chains.

191 The species  $\text{C}_\beta$  indicated the carbon atoms of carboxyl group, while  $\text{O}_\beta$  indicated the coordinated oxygen.

192 The species  $\text{O}_\alpha$  indicated oxygen of noncarboxylic hydroxyl group.

193

194 **Table S4** Composition of the molecular orbital for  $\text{Sb}_2(\text{tar})_2^{2-}$  complex shown in **Figure S3** (Hirshfeld)

|        | E (eV)*   | Sb    |      | Coordinated atom |                  | C <sub>α</sub> H | C <sub>β</sub> OO | Major component       |
|--------|-----------|-------|------|------------------|------------------|------------------|-------------------|-----------------------|
|        |           | Sb1%  | Sb2% | O <sub>α</sub> % | O <sub>β</sub> % | tot%             | tot%              |                       |
| MO-0   | -30486.17 | 100.0 |      |                  |                  |                  |                   | Sb 1s                 |
| MO-1   | -30486.17 |       | 100% |                  |                  |                  |                   | Sb 1s                 |
| MO-126 | 7.34      | 35.2  | 35.2 | 15.2             | 6.6              | 4.5              | 9.9               | Sb                    |
| MO-127 | 7.48      | 33.2  | 33.2 | 8.5              | 14.3             | 4.9              | 20.2              | Sb + COO <sub>β</sub> |
| MO-128 | 8.05      | 33.2  | 33.2 | 9.2              | 12.7             | 6.3              | 18.1              | Sb                    |
| MO-129 | 8.23      | 33.0  | 33.0 | 18.2             | 6.3              | 6.1              | 9.7               | Sb                    |
| MO-130 | 8.78      | 18.8  | 18.8 | 12.0             | 6.5              | 29.0             | 21.4              | Sb + C <sub>α</sub> H |
| MO-131 | 9.15      | 14.2  | 14.2 | 5.5              | 5.0              | 46.6             | 19.5              | Sb + C <sub>α</sub> H |

195 \* The energy indicated the eigenvalues of the Kohn-Sham equation.

196

197

198

199 **Table S5** Composition of the molecular orbital for Sb(EDTA)<sup>-</sup> complex shown in **Figure S4** (SCPA)

|        | E (eV)*   | Sb    |       | Coordinated atom |          | C <sub>α</sub> H ** |      | C <sub>β</sub> H%** |         | C <sub>γ</sub> OO%** | Component                                   |
|--------|-----------|-------|-------|------------------|----------|---------------------|------|---------------------|---------|----------------------|---------------------------------------------|
|        |           | Sb%   | Sb p% | O <sub>α</sub> % | N%       | tot%                | s%   | tot%                | s%      | tot%                 |                                             |
| MO-0   | -30489.51 | 100.0 | 0.0   |                  |          |                     |      |                     |         |                      | Sb 1s                                       |
| MO-101 | 4.16      | 5.7   | 3.9   | 0.7              | 10.0 (s) | 66.2                | 58.7 | 15.9                | 14.3    | 2.2                  | C <sub>α</sub> H (s)                        |
| MO-102 | 4.82      | 6.9   | 3.3   | 0.3              | 2.8 (p)  | 73.4                | 67.0 | 13.0                | 8.6     | 3.9                  | C <sub>α</sub> H (s)                        |
| MO-103 | 5.00      | 9.9   | 9.5   | 3.3              | 3.7 (p)  | 53.9                | 45.3 | 24.6                | 22.4(p) | 7.9                  | C <sub>α</sub> H (s) + C <sub>β</sub> H (p) |
| MO-107 | 5.91      | 2.7   | 2.1   | 1.2              | 9.4 (s)  | 69.3                | 61.9 | 15.6                | 14.0    | 3.1                  | C <sub>α</sub> H (s)                        |
| MO-115 | 7.36      | 0.1   |       | 0.2              | 1.8 (p)  | 74.7                | 70.1 | 21.7                | 19.7    | 1.6                  | C <sub>α</sub> H (s) + C <sub>β</sub> H (s) |

200 \* The energy indicated the eigenvalues of the Kohn-Sham equation.

201 \*\* The species C<sub>α</sub>H indicated the hydrocarbon chain between two nitrogen atoms.

202 The species C<sub>β</sub>H indicated the hydrocarbon chains between nitrogen atoms and carboxyl groups, while O<sub>α</sub> and O<sub>β</sub> indicated the coordinated  
 203 oxygen and the non-coordinated oxygen.

204

205

206

207

208

209 **Table S6** Composition of the molecular orbital for Sb(EDTA)<sup>-</sup> complex shown in **Figure S4** (Hirshfeld)

|        | E (eV)*   | Sb    | Coordinated atom |     |      | C <sub>α</sub> H | C <sub>β</sub> H% | C <sub>γ</sub> OO% | Component                           |
|--------|-----------|-------|------------------|-----|------|------------------|-------------------|--------------------|-------------------------------------|
|        |           | Sb%   | O <sub>α</sub> % | N%  | tot% | tot%             | tot%              |                    |                                     |
| MO-0   | -30489.51 | 100.0 |                  |     |      |                  |                   |                    | Sb 1s                               |
| MO-101 | 4.16      | 35.0  | 6.2              | 6.7 | 30.5 | 18.1             | 9.7               |                    | Sb + C <sub>α</sub> H               |
| MO-102 | 4.82      | 27.0  | 5.8              | 9.6 | 33.5 | 18.6             | 11.3              |                    | Sb + C <sub>α</sub> H               |
| MO-103 | 5.00      | 47.2  | 18.0             | 2.2 | 8.5  | 9.3              | 32.8              |                    | Sb + C <sub>γ</sub> OO              |
| MO-107 | 5.91      | 38.4  | 16.7             | 4.1 | 18.7 | 13.9             | 24.9              |                    | Sb + C <sub>γ</sub> OO              |
| MO-115 | 7.36      | 4.2   | 4.3              | 4.4 | 39.1 | 36.3             | 16.1              |                    | C <sub>α</sub> H + C <sub>β</sub> H |

210 \* The energy indicated the eigenvalues of the Kohn-Sham equation.

211

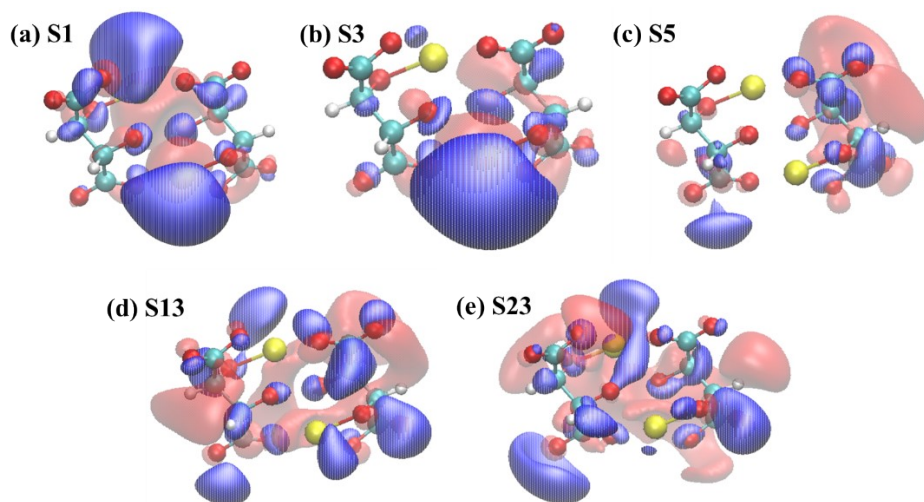

212

213

**Figure S6** Electron NTOs for  $\text{Sb}_2(\text{tar})_2^{2-}$  complex.

214

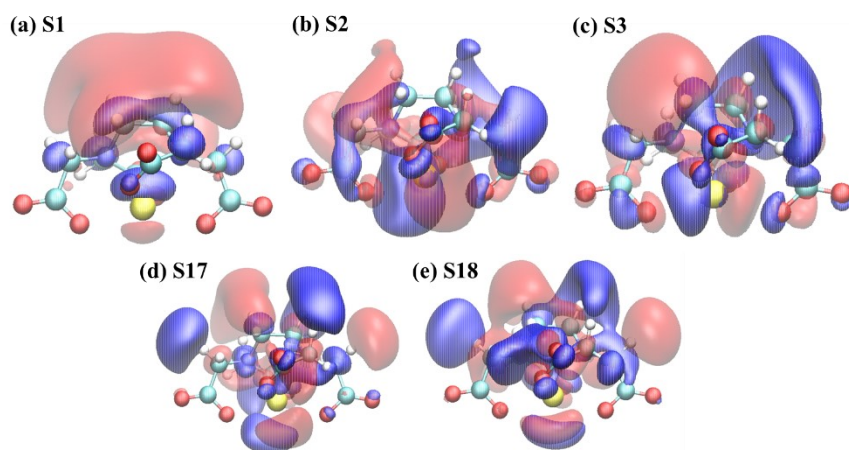

215

216

**Figure S7** Electron NTOs for  $\text{Sb}(\text{EDTA})^-$  complex.

217

218

219

220

221

222

223

224

225 **Table S7** Composition of the electron NTO for  $\text{Sb}_2(\text{tar})_2^{2-}$  complex (SCPA)

|         | $E_{\text{trans}}$ (eV) * | Sb   |        | Coordinated atom            |                             | Functional group            |                             | Major component                                       |
|---------|---------------------------|------|--------|-----------------------------|-----------------------------|-----------------------------|-----------------------------|-------------------------------------------------------|
|         |                           | Sb%  | Sb 5p% | $\text{C}_\alpha\text{H}$ % | $\text{C}_\beta\text{OO}$ % | $\text{C}_\alpha\text{H}$ % | $\text{C}_\beta\text{OO}$ % |                                                       |
| S1/S2   | 30495.81                  | 38.0 | 26.9   | 34.1                        | 19.2                        | 34.1                        | 19.2                        | Sb 5p + $\text{C}_\alpha\text{H}$                     |
| S3/S4   | 30496.47                  | 23.5 | 15.5   | 58.2                        | 13.0                        | 58.2                        | 13.0                        | Sb 5p + $\text{C}_\alpha\text{H}$                     |
| S5/S6   | 30498.37                  | 3.1  | 1.5    | 69.4                        | 24.9                        | 69.4                        | 24.9                        | $\text{C}_\alpha\text{H}$ + $\text{C}_\beta\text{OO}$ |
| S13/S14 | 30503.57                  | 4.6  | 1.5    | 66.9                        | 26.6                        | 66.9                        | 26.6                        | $\text{C}_\alpha\text{H}$ + $\text{C}_\beta\text{OO}$ |
| S23/S24 | 30505.3                   | 6.6  | 2.7    | 45.0                        | 41.2                        | 45.0                        | 41.2                        | $\text{C}_\alpha\text{H}$ + $\text{C}_\beta\text{OO}$ |

226 \* The transition energy was calculated from the sum of calculated value and the energy shift of 12.5 eV.

227

228 **Table S8** Composition of the electron NTO for  $\text{Sb}_2(\text{tar})_2^{2-}$  complex (Hirshfeld)

|        | $E_{\text{trans}}$ (eV) * | Sb   |      | Coordinated atom    |                    | Functional group            |                             | Major component                                       |
|--------|---------------------------|------|------|---------------------|--------------------|-----------------------------|-----------------------------|-------------------------------------------------------|
|        |                           | Sb1% | Sb2% | $\text{O}_\alpha\%$ | $\text{O}_\beta\%$ | $\text{C}_\alpha\text{H}$ % | $\text{C}_\beta\text{OO}$ % |                                                       |
| S1/2   | 30495.81                  | 42.4 | 24.4 | 11.8                | 9.2                | 6.6                         | 14.8                        | Sb                                                    |
| S3/4   | 30496.47                  | 2.5  | 61.1 | 13.6                | 11.0               | 6.4                         | 16.4                        |                                                       |
| S5/6   | 30498.37                  | 4.1  | 3.6  | 3.5                 | 6.4                | 46.3                        | 42.5                        |                                                       |
| S13/14 | 30503.57                  | 9.5  | 6.8  | 6.9                 | 10.9               | 29.2                        | 47.7                        | $\text{C}_\alpha\text{H}$ + $\text{C}_\beta\text{OO}$ |
| S23/24 | 30505.30                  | 15.1 | 6.3  | 11.4                | 12.8               | 28.0                        | 39.2                        |                                                       |

229 \* The transition energy was calculated from the sum of calculated value and the energy shift of 12.5 eV.

230



231 **Table S9** Composition of the electron NTO for Sb(EDTA)<sup>-</sup> complex (SCPA)

|     | E <sub>trans</sub> (eV) * | Sb  |        | Coordinated atom |     | Functional group  |                   |                    | Major component                     |
|-----|---------------------------|-----|--------|------------------|-----|-------------------|-------------------|--------------------|-------------------------------------|
|     |                           | Sb% | Sb 5p% | O <sub>α</sub> % | N%  | C <sub>α</sub> H% | C <sub>β</sub> H% | C <sub>γ</sub> OO% |                                     |
| S1  | 30494.45                  | 3.2 | 0.6    | 0.0              | 2.3 | 75.6              | 16.9              | 2.0                |                                     |
| S2  | 30495.12                  | 3.3 | 2.8    | 1.0              | 4.7 | 56.9              | 28.6              | 6.7                | C <sub>α</sub> H                    |
| S3  | 30495.51                  | 0.6 | < 0.6  | 0.4              | 6.7 | 73.5              | 14.8              | 4.3                | C <sub>α</sub> H + C <sub>β</sub> H |
| S17 | 30504.00                  | 1.3 | 1.2    | 0.6              | 1.1 | 51.3              | 37.9              | 8.5                | C <sub>β</sub> H                    |
| S18 | 30504.40                  | 1.5 | 1.4    | 0.4              | 4.4 | 72.2              | 20.0              | 2.0                | C <sub>α</sub> H + C <sub>β</sub> H |

232 \* The transition energy was calculated from the sum of calculated value and the energy shift of 11.0 eV.

233

234 **Table S10** Composition of the electron NTO for Sb(EDTA)<sup>-</sup> complex for the local structure (Hirshfeld)

|     | E <sub>trans</sub> (eV) * | Sb   | Coordinated atom |     | Functional group  |                   |                    | Major component                                         |
|-----|---------------------------|------|------------------|-----|-------------------|-------------------|--------------------|---------------------------------------------------------|
|     |                           | Sb%  | O <sub>α</sub> % | N%  | C <sub>α</sub> H% | C <sub>β</sub> H% | C <sub>γ</sub> OO% |                                                         |
| S1  | 30494.45                  | 4.4  | 1.4              | 1.3 | 59.2              | 29.2              | 5.9                | C <sub>α</sub> H + C <sub>β</sub> H                     |
| S2  | 30495.12                  | 30.2 | 15.6             | 2.7 | 10.7              | 24.2              | 32.2               | Sb 5p + C <sub>β</sub> H + C <sub>γ</sub> OO            |
| S3  | 30495.51                  | 16.5 | 8.8              | 2.9 | 34.6              | 26.8              | 19.1               | C <sub>α</sub> H + C <sub>β</sub> H                     |
| S17 | 30504.00                  | 7.7  | 5.0              | 2.5 | 29.8              | 42.5              | 17.5               |                                                         |
| S18 | 30504.40                  | 6.8  | 8.9              | 3.0 | 29.6              | 36.0              | 24.6               | C <sub>α</sub> H + C <sub>β</sub> H + C <sub>γ</sub> OO |

235 \* The transition energy was calculated from the sum of calculated value and the energy shift of 11.0 eV.

236

237 **Table S11** Atomic composition of the electron NTO for  $\text{Sb}_2(\text{tar})_2^{2-}$  complex (SCPA)

| □Species*                 | S1   | S3    | S5    | S13   | S23   |       |
|---------------------------|------|-------|-------|-------|-------|-------|
| $\text{C}_\alpha\text{H}$ | C1   | 14.5% | 20.3% | 32.4% | 24.4% | 5.1%  |
|                           | C2   | 2.3%  | 23.9% | 1.0%  | 6.9%  | 4.6%  |
|                           | C11  | 1.2%  | 8.8%  | 0.7%  | 7.5%  | 6.6%  |
|                           | C12  | 11.9% | 3.5%  | 9.7%  | 20.1% | 22.5% |
|                           | H23  | 1.6%  | 0.3%  | 22.8% | 6.1%  | 1.0%  |
|                           | H9   | 0.1%  | 0.0%  | 2.1%  | 0.2%  | 2.6%  |
|                           | H20  | 0.2%  | 0.9%  | 0.4%  | 1.3%  | 0.6%  |
|                           | H24  | 2.2%  | 0.5%  | 0.3%  | 0.4%  | 2.2%  |
| $\text{C}_\beta$          | C3   | 1.6%  | 1.3%  | 5.2%  | 2.2%  | 0.2%  |
|                           | C4   | 1.7%  | 4.1%  | 2.3%  | 1.3%  | 3.9%  |
|                           | C13  | 4.9%  | 2.3%  | 0.7%  | 6.4%  | 2.2%  |
|                           | C14  | 2.5%  | 1.0%  | 5.7%  | 7.2%  | 17.4% |
| $\text{O}_\alpha$         | O10  | 0.3%  | 0.2%  | 0.7%  | 0.3%  | 1.3%  |
|                           | O19  | 0.9%  | 0.0%  | 0.3%  | 0.6%  | 2.3%  |
|                           | O21  | 0.8%  | 0.9%  | 1.2%  | 0.8%  | 1.8%  |
|                           | O22  | 6.7%  | 4.3%  | 0.4%  | 0.4%  | 1.8%  |
| $\text{O}_\beta$          | O5   | 0.4%  | 0.1%  | 0.2%  | 0.2%  | 0.2%  |
|                           | O7   | 3.4%  | 0.6%  | 1.3%  | 0.9%  | 3.2%  |
|                           | O16  | 1.4%  | 2.1%  | 0.3%  | 2.2%  | 2.3%  |
|                           | O18  | 1.1%  | 0.1%  | 0.2%  | 0.2%  | 3.3%  |
| $\text{O}_\gamma$         | O6   | 0.0%  | 0.7%  | 1.1%  | 0.1%  | 0.4%  |
|                           | O8   | 0.3%  | 0.4%  | 3.8%  | 1.6%  | 0.1%  |
|                           | O15  | 1.8%  | 0.1%  | 0.0%  | 0.1%  | 0.5%  |
|                           | O17  | 0.2%  | 0.3%  | 4.3%  | 4.3%  | 7.6%  |
| Sb                        | Sb25 | 15.7% | 0.9%  | 1.8%  | 4.0%  | 5.9%  |
|                           | Sb26 | 22.3% | 22.6% | 1.3%  | 0.6%  | 0.7%  |

238

239

240

241 **Table S12** Atomic composition of the electron NTO for  $\text{Sb}_2(\text{tar})_2^{2-}$  complex (Hirshfeld)

| □Species*        | S1   | S3   | S5   | S13  | S23  |      |
|------------------|------|------|------|------|------|------|
| C <sub>α</sub> H | C1   | 1.7  | 2.2  | 9.6  | 5.5  | 3.5  |
|                  | C2   | 0.4  | 0.8  | 3.9  | 3.9  | 6.2  |
|                  | C11  | 1.0  | 0.4  | 0.8  | 2.3  | 1.9  |
|                  | C12  | 0.8  | 0.8  | 1.1  | 1.9  | 1.4  |
|                  | H23  | 1.1  | 1.0  | 24.6 | 7.3  | 2.7  |
|                  | H9   | 0.3  | 0.1  | 4.6  | 2.8  | 8.5  |
|                  | H20  | 0.4  | 0.4  | 0.8  | 2.5  | 1.9  |
|                  | H24  | 0.9  | 0.7  | 1.0  | 2.9  | 1.8  |
| C <sub>β</sub>   | C3   | 1.3  | 0.5  | 8.2  | 14.1 | 0.8  |
|                  | C4   | 0.8  | 1.2  | 7.5  | 2.5  | 7.0  |
|                  | C13  | 0.9  | 0.2  | 0.3  | 1.9  | 1.8  |
|                  | C14  | 0.8  | 1.6  | 3.5  | 2.7  | 3.5  |
| O <sub>α</sub>   | O10  | 1.6  | 2.8  | 1.2  | 1.8  | 2.5  |
|                  | O19  | 2.4  | 0.3  | 0.8  | 2.0  | 4.1  |
|                  | O21  | 1.8  | 2.5  | 0.4  | 0.9  | 1.1  |
|                  | O22  | 6.1  | 8.0  | 1.1  | 2.1  | 3.7  |
| O <sub>β</sub>   | O5   | 1.3  | 0.2  | 2.3  | 5.5  | 1.0  |
|                  | O7   | 1.7  | 3.9  | 2.6  | 1.8  | 4.6  |
|                  | O16  | 2.4  | 6.7  | 1.2  | 2.9  | 3.3  |
|                  | O18  | 3.7  | 0.1  | 0.2  | 0.7  | 3.8  |
| O <sub>γ</sub>   | O6   | 0.3  | 0.8  | 5.2  | 1.2  | 3.8  |
|                  | O8   | 0.4  | 0.2  | 7.1  | 9.1  | 1.3  |
|                  | O15  | 0.8  | 0.1  | 0.2  | 1.7  | 1.0  |
|                  | O17  | 0.3  | 0.8  | 4.1  | 3.5  | 7.2  |
| Sb               | Sb25 | 42.4 | 2.5  | 4.1  | 9.5  | 15.1 |
|                  | Sb26 | 24.4 | 61.1 | 3.6  | 6.8  | 6.3  |

243

244

245

246 **Table S13** Atomic composition of the electron NTO for Sb(EDTA)<sup>-</sup> complex (SCPA)

| Species          |      | S1    | S2    | S3    | S17   | S18   |
|------------------|------|-------|-------|-------|-------|-------|
| C <sub>α</sub> H | C1   | 26.0% | 25.8% | 34.1% | 21.5% | 12.4% |
|                  | H2   | 10.2% | 1.0%  | 0.3%  | 2.0%  | 0.3%  |
|                  | H3   | 1.6%  | 1.7%  | 2.4%  | 2.2%  | 0.5%  |
|                  | C4   | 26.0% | 25.8% | 34.1% | 21.5% | 12.4% |
|                  | H5   | 1.6%  | 1.7%  | 2.4%  | 2.2%  | 0.5%  |
|                  | H6   | 10.2% | 1.0%  | 0.3%  | 2.0%  | 0.3%  |
| N                | N7   | 1.1%  | 2.3%  | 3.3%  | 0.6%  | 1.0%  |
|                  | N8   | 1.1%  | 2.3%  | 3.3%  | 0.6%  | 1.0%  |
| C <sub>β</sub> H | C9   | 2.1%  | 9.6%  | 5.3%  | 13.4% | 17.2% |
|                  | H10  | 0.5%  | 1.3%  | 0.1%  | 2.6%  | 0.0%  |
|                  | H11  | 0.3%  | 2.3%  | 0.4%  | 0.3%  | 0.3%  |
|                  | C12  | 3.2%  | 0.9%  | 1.2%  | 1.3%  | 2.5%  |
|                  | H13  | 0.9%  | 0.2%  | 0.2%  | 0.0%  | 0.2%  |
|                  | H14  | 1.5%  | 0.1%  | 0.2%  | 1.3%  | 0.2%  |
|                  | C15  | 2.1%  | 9.6%  | 5.3%  | 13.4% | 17.2% |
|                  | H16  | 0.5%  | 1.3%  | 0.1%  | 2.6%  | 0.0%  |
|                  | H17  | 0.3%  | 2.3%  | 0.4%  | 0.3%  | 0.3%  |
|                  | C18  | 3.2%  | 0.9%  | 1.2%  | 1.3%  | 2.5%  |
|                  | H19  | 0.9%  | 0.2%  | 0.2%  | 0.0%  | 0.2%  |
|                  | H20  | 1.5%  | 0.1%  | 0.2%  | 1.3%  | 0.2%  |
| C <sub>γ</sub>   | C21  | 0.6%  | 0.9%  | 1.4%  | 2.5%  | 6.6%  |
|                  | C22  | 0.6%  | 0.9%  | 1.4%  | 2.5%  | 6.6%  |
|                  | C23  | 0.4%  | 0.4%  | 0.5%  | 1.1%  | 2.3%  |
|                  | C24  | 0.4%  | 0.4%  | 0.5%  | 1.1%  | 2.3%  |
| O <sub>α</sub>   | O25  | 0.0%  | 1.3%  | 0.0%  | 0.2%  | 0.4%  |
|                  | O27  | 0.0%  | 1.3%  | 0.0%  | 0.2%  | 0.4%  |
|                  | O28  | 0.0%  | 0.3%  | 0.0%  | 0.1%  | 0.3%  |
|                  | O30  | 0.0%  | 0.3%  | 0.0%  | 0.1%  | 0.3%  |
| O <sub>β</sub>   | O26  | 0.0%  | 0.3%  | 0.1%  | 0.3%  | 1.0%  |
|                  | O29  | 0.0%  | 0.2%  | 0.1%  | 0.0%  | 3.2%  |
|                  | O31  | 0.0%  | 0.3%  | 0.1%  | 0.3%  | 1.0%  |
|                  | O32  | 0.0%  | 0.2%  | 0.1%  | 0.0%  | 3.2%  |
| Sb               | Sb33 | 3.2%  | 3.3%  | 0.6%  | 1.3%  | 3.4%  |

247

248 **Table S14** Atomic composition (%) of the electron NTO for Sb(EDTA)<sup>-</sup> complex

249 (Hirshfeld)

| Species          |      | S1   | S2   | S3   | S17 | S18 |
|------------------|------|------|------|------|-----|-----|
| C <sub>α</sub> H | C1   | 8.1  | 1.4  | 5.1  | 3.5 | 4.8 |
|                  | H2   | 16.8 | 1.9  | 4.2  | 7.7 | 5.7 |
|                  | H3   | 4.7  | 2.0  | 8.0  | 3.7 | 4.3 |
|                  | C4   | 8.1  | 1.4  | 5.1  | 3.5 | 4.8 |
|                  | H5   | 4.7  | 2.0  | 8.0  | 3.7 | 4.3 |
|                  | H6   | 16.8 | 1.9  | 4.2  | 7.7 | 5.7 |
| N                | N7   | 0.7  | 1.4  | 1.4  | 1.2 | 1.5 |
|                  | N8   | 0.7  | 1.4  | 1.4  | 1.2 | 1.5 |
| C <sub>β</sub> H | C9   | 1.3  | 2.3  | 2.5  | 2.6 | 3.6 |
|                  | H10  | 1.7  | 2.3  | 1.9  | 7.2 | 8.0 |
|                  | H11  | 1.4  | 3.0  | 4.0  | 1.2 | 2.0 |
|                  | C12  | 2.6  | 1.9  | 1.6  | 3.1 | 1.6 |
|                  | H13  | 1.5  | 1.9  | 1.6  | 1.1 | 1.2 |
|                  | H14  | 6.1  | 0.8  | 1.9  | 6.0 | 1.6 |
|                  | C15  | 1.3  | 2.3  | 2.6  | 2.6 | 1.2 |
|                  | H16  | 1.7  | 2.3  | 1.9  | 7.2 | 8.0 |
|                  | H17  | 1.4  | 3.0  | 4.0  | 1.2 | 2.0 |
|                  | C18  | 2.6  | 1.9  | 1.6  | 3.1 | 1.6 |
|                  | H19  | 1.5  | 1.9  | 1.6  | 1.1 | 1.2 |
|                  | H20  | 6.1  | 0.8  | 1.9  | 6.0 | 1.6 |
| C <sub>γ</sub>   | C21  | 0.4  | 2.5  | 1.3  | 0.9 | 1.0 |
|                  | C22  | 0.4  | 2.5  | 1.3  | 0.9 | 1.0 |
|                  | C23  | 1.2  | 3.0  | 2.2  | 2.8 | 4.1 |
|                  | C24  | 1.2  | 3.0  | 2.2  | 2.8 | 4.1 |
| O <sub>α</sub>   | O25  | 0.2  | 3.4  | 2.6  | 0.8 | 0.7 |
|                  | O27  | 0.2  | 3.4  | 2.6  | 0.8 | 0.7 |
|                  | O28  | 0.5  | 4.4  | 1.8  | 1.7 | 3.8 |
|                  | O30  | 0.5  | 4.4  | 1.8  | 1.7 | 3.8 |
| O <sub>β</sub>   | O26  | 0.5  | 1.1  | 1.0  | 1.8 | 2.2 |
|                  | O29  | 0.1  | 1.6  | 0.7  | 0.7 | 0.6 |
|                  | O31  | 0.5  | 1.1  | 1.0  | 1.8 | 2.2 |
|                  | O32  | 0.1  | 1.6  | 0.7  | 0.7 | 0.6 |
| Sb               | Sb33 | 4.4  | 30.1 | 16.5 | 7.7 | 6.8 |

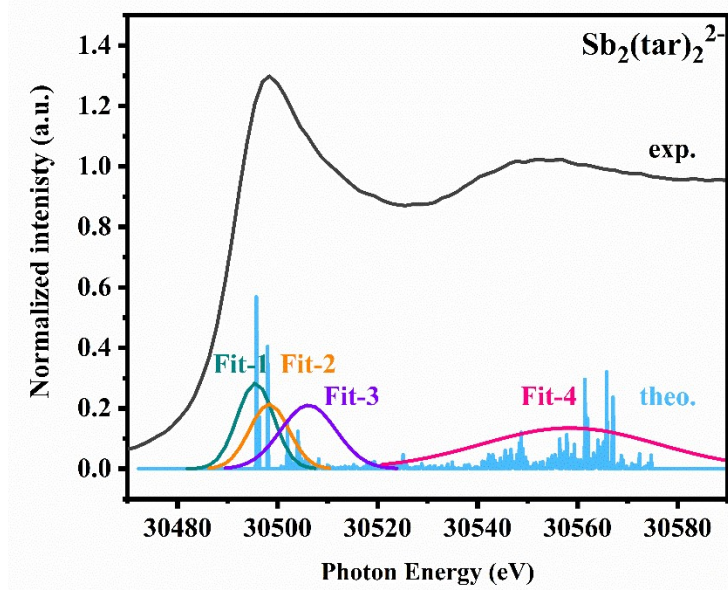

251

252 **Figure S8** Experimental and simulated Sb K-edge X-ray absorption spectrum of  
 253  $\text{Sb}_2(\text{tar})_2^{2-}$  complex. The subpeaks of experimental spectrum were result from peak  
 254 fitting roughly based on the calculated spectrum with corresponding characteristics.  
 255 The calculated spectra were shifted 72.2 eV.

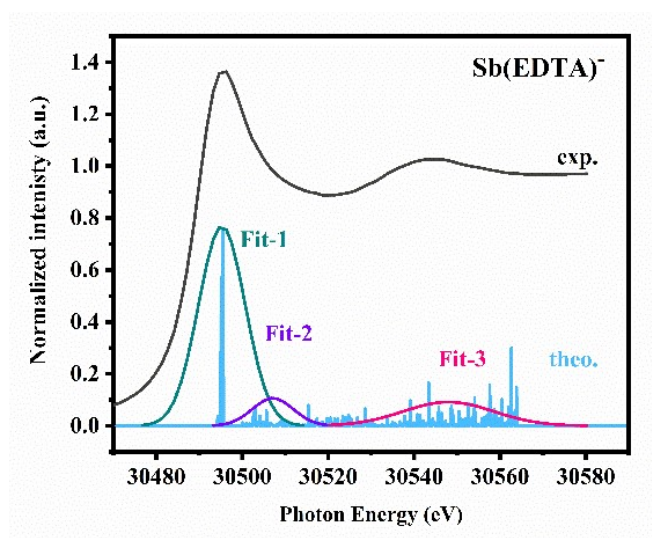

256

257 **Figure S9** Experimental and simulated Sb K-edge X-ray absorption spectrum of  
 258  $\text{Sb}(\text{EDTA})^-$  complex. The subpeaks of experimental spectrum were result from peak  
 259 fitting roughly based on the calculated spectrum with corresponding characteristics.  
 260 The calculated spectra were shifted 70.7 eV.

261

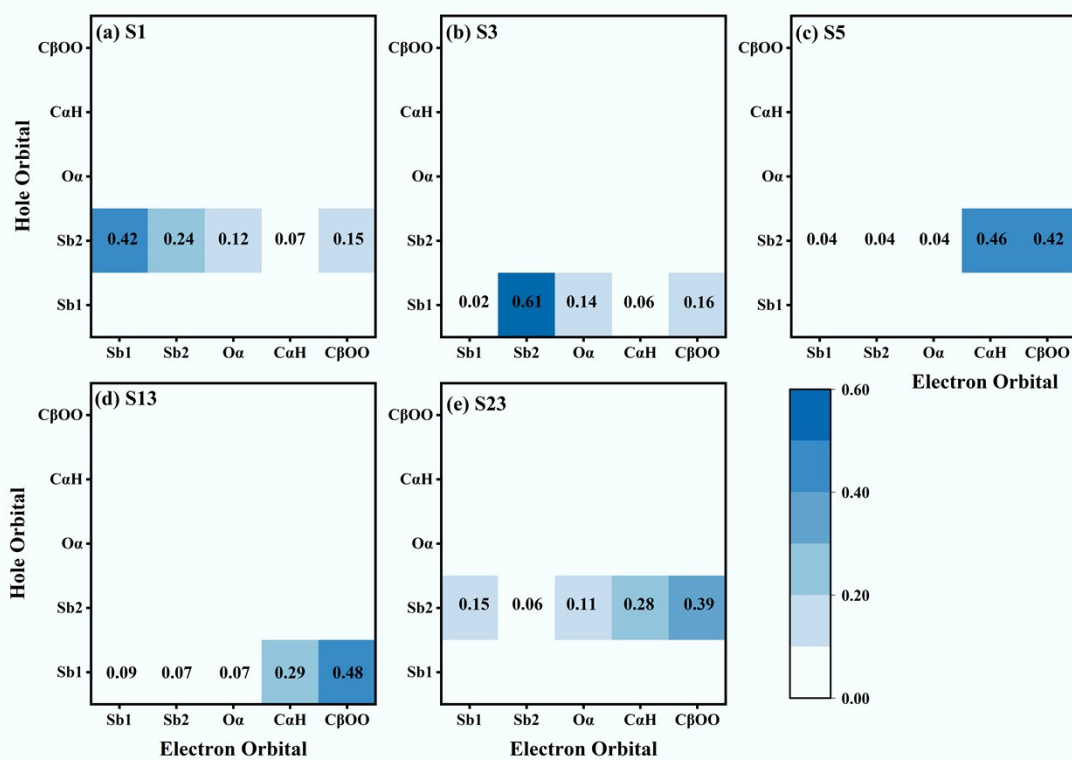

262

263 **Figure S10** Heat map for the transitions in  $\text{Sb}_2(\text{tar})_2^{2-}$  complex with IFCT analysis.

264

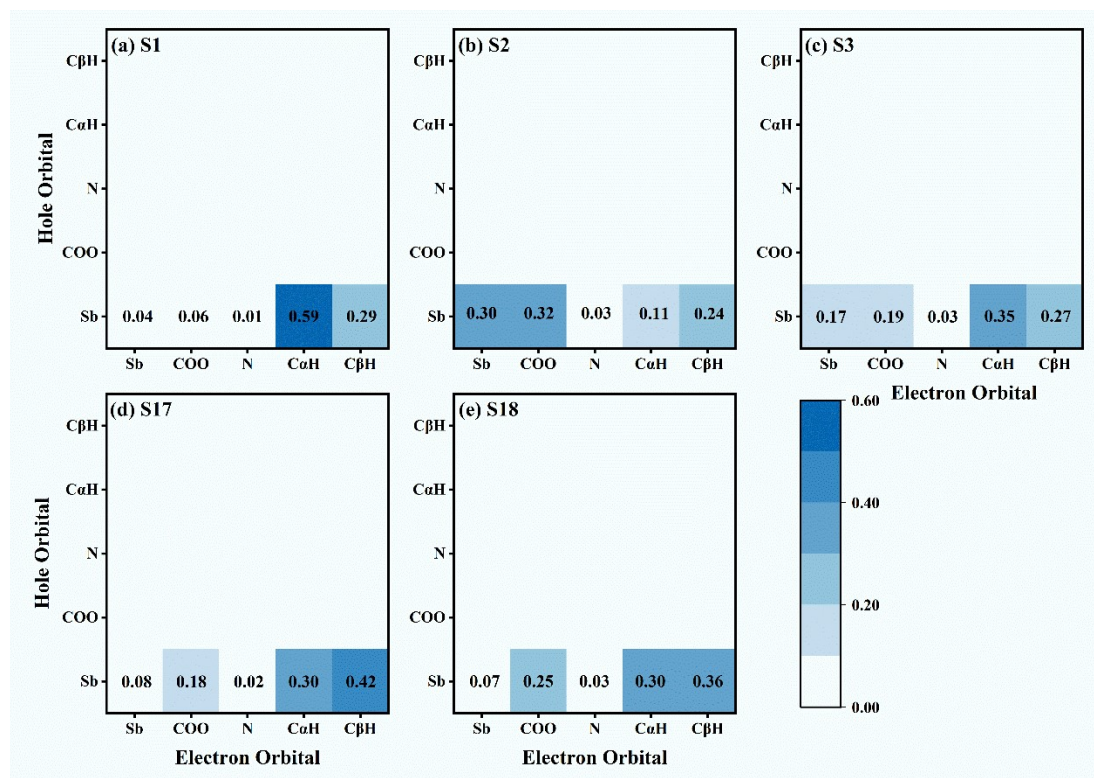

265

266 **Figure S11** Heat map for the transitions in  $\text{Sb}(\text{EDTA})^-$  complex with IFCT analysis.

267

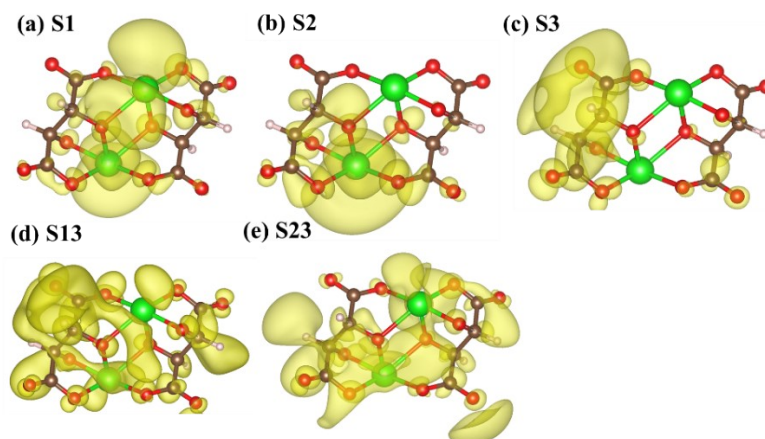

268

269 **Figure S12** Electron orbital for  $\text{Sb}_2(\text{tar})_2^{2-}$  complex.

270

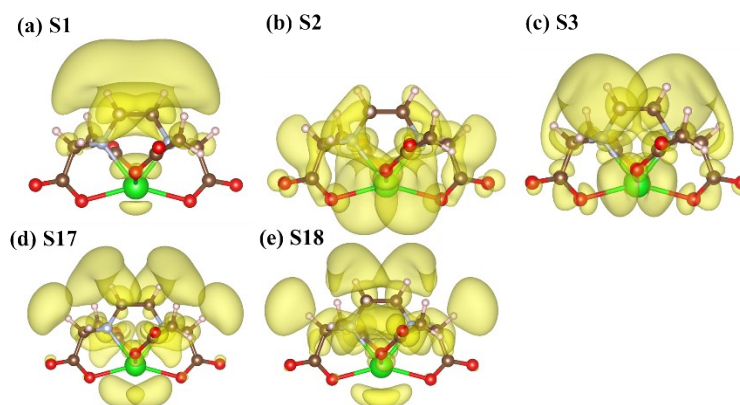

271

272 **Figure S13** Electron orbital for  $\text{Sb}(\text{EDTA})^-$  complex.

273

274 **Note S7** Definition of the parameter in NTO analysis and electron-hole analysis.

275 Process of single-electron excitation can be described as the electron transition from  
 276 the hole orbital to the electron orbital. However, in most practical cases, the single MO  
 277 pair representation is not suitable, excitations have to be represented as transition of  
 278 multiple MO pairs with corresponding weighting coefficients. Therefore, the NTO or  
 279 electron-hole analysis<sup>5-7</sup> were performed. The relevant concept based on this theory was  
 280 detailed here.

281 (1) Density of hole and electron orbital ( $\rho$ )

282 The density of hole and electron orbitals rather than wavefunctions was used in form of



283  $\rho^{\text{hole}}(\mathbf{r})$  and  $\rho^{\text{ele}}(\mathbf{r})$ , where  $\mathbf{r}$  is the position vector. The integral of the density to the whole  
284 space must be one.

$$285 \int \rho^{\text{hole}}(r) dr = 1$$

$$286 \int \rho^{\text{ele}}(r) dr = 1$$

287 (2) Centroid distance between hole and electron orbitals ( $D$ )

288 Centroid can be calculated to reveal most representative position of hole and electron  
289 distribution. The centroid ( $X$ ,  $Y$ ,  $Z$ ) was the weighted average of the position of the  
290 orbitals where:

291

$$292 X_h = \int \rho^{\text{hole}}(x) x dx \quad X_e = \int \rho^{\text{ele}}(x) x dx$$

$$293 Y_h = \int \rho^{\text{hole}}(y) y dy \quad Y_e = \int \rho^{\text{ele}}(y) y dy$$

$$294 Z_h = \int \rho^{\text{hole}}(z) z dz \quad Z_e = \int \rho^{\text{ele}}(z) z dz$$

295

296 Naturally, the centroid distance  $D$  was written as

297

$$298 D = \sqrt{(X_h - X_e)^2 + (Y_h - Y_e)^2 + (Z_h - Z_e)^2}$$

299

300 In this work, the centroid distance  $D$  was the charge transfer (CT) distance. The  
301 definition of the density and centroid distance  $D$  was identical for both of NTO analysis  
302 and electron-hole analysis.

303 (3) RMSD of hole and electron orbitals ( $\sigma$ )

304 The root mean square deviation (RMSD,  $\sigma$ ) of the hole and electron orbitals can be used  
305 to characterize their extent of spatial distribution. The RMSD in different direction was  
306 defined as:

307

$$308 \quad \sigma_{hole,x} = \sqrt{\int (x - X_h)^2 \rho^{hole}(x) dx} \quad \sigma_{ele,x} = \sqrt{\int (x - X_h)^2 \rho^{ele}(x) dx}$$

$$309 \quad \sigma_{hole,y} = \sqrt{\int (y - Y_h)^2 \rho^{hole}(y) dy} \quad \sigma_{ele,y} = \sqrt{\int (y - Y_h)^2 \rho^{ele}(y) dy}$$

$$310 \quad \sigma_{hole,z} = \sqrt{\int (z - Z_h)^2 \rho^{hole}(z) dz} \quad \sigma_{hole,z} = \sqrt{\int (z - Z_h)^2 \rho^{ele}(z) dz}$$

311

312 The overall RMSD of hole and electron orbital was defined as:

313

$$314 \quad \sigma_{hole} = \sqrt{\sigma_{hole,x}^2 + \sigma_{hole,y}^2 + \sigma_{hole,z}^2}$$

$$315 \quad \sigma_{ele} = \sqrt{\sigma_{ele,x}^2 + \sigma_{ele,y}^2 + \sigma_{ele,z}^2}$$

316 (4) Transition dipole moment ( $\mu_{CT}$ )

317 The transition dipole moment was defined as the vector of  $\mu_{CT}$  in definition as:

318

$$319 \quad \mu_{CT} = (-e(X_e - X_h), -e(Y_e - Y_h), -e(Z_e - Z_h))$$

320

321 (5) Spatial extension of hole and electron orbitals in CT direction ( $H_{CT}$ )

322 The hole and electron orbital extended to the whole space from the centroid with varied

323 RMSD. The  $\mathbf{H}$  vector ( $H_x, H_y, H_z$ ) measures average degree of spatial extension of

324 hole and electron distribution in specific direction, where

325

$$326 \quad H_x = \frac{\sigma_{hole,x} + \sigma_{ele,x}}{2} \quad H_y = \frac{\sigma_{hole,y} + \sigma_{ele,y}}{2} \quad H_z = \frac{\sigma_{hole,z} + \sigma_{ele,z}}{2}$$

327

328 The  $H_{CT}$  was the spatial extension of hole and electron orbitals in CT direction,

329 therefore, it's defined as

$$330 \quad H_{CT} = \frac{|H \cdot \mu_{CT}|}{|\mu_{CT}|}$$

331

332 (6) t index

333 The t index is used to measure separation degree of hole and electron in CT direction,

334 in definition of:

335

336  $t = D - H_{CT}$

337

338 (7) Overlap degree of hole and electron orbitals ( $S^2$ )

339 The overlap degree ( $S^2$ ) was the integral of the product of density of hole and electron  
340 orbitals in any position with definition of:

341

342 
$$S^2 = \int \rho^{hole}(r)\rho^{ele}(r)dr$$

343

344 This value was calculated via Becke's grid-based numerical integration approach rather  
345 than the analytical.

346

347 (8)  $C_{ele}$

348 The density of electron orbital was smoothed with Gaussian-like function.

349

350 
$$C_{ele}(r) = A_e \exp\left(-\frac{(x - X_e)^2}{2\sigma_{e,x}^2} - \frac{(y - Y_e)^2}{2\sigma_{e,y}^2} - \frac{(z - Z_e)^2}{2\sigma_{e,z}^2}\right)$$

351 where  $A_e$  was the normalized factor of the function.

352

353

354 **Table S15** Transition analysis for  $Sb_2(tar)_2^{2-}$  complex

| No. | NTO analysis |                | electron-hole analysis |                     |                    |              |       |
|-----|--------------|----------------|------------------------|---------------------|--------------------|--------------|-------|
|     | D (Å)        | Overlap- $S^2$ | D (Å)                  | $\sigma_{hole}$ (Å) | $\sigma_{ele}$ (Å) | $H_{CT}$ (Å) | t (Å) |
| S1  | 2.41         | 0.289          | 2.39                   | 0.00                | 2.99               | 0.88         | 1.51  |
| S3  | 3.64         | 0.008          | 3.67                   | 0.05                | 2.35               | 0.69         | 2.98  |
| S5  | 2.89         | 0.024          | 2.86                   | 0.00                | 3.52               | 1.05         | 1.81  |
| S13 | 1.93         | 0.028          | 1.93                   | 0.05                | 3.68               | 1.21         | 0.72  |
| S23 | 1.75         | 0.020          | 1.73                   | 0.00                | 3.95               | 0.99         | 0.74  |

355

356

357 **Table S16** Transition analysis for Sb(EDTA)<sup>-</sup> complex

| No. | NTO analysis |                        | electron-hole analysis |                            |                           |                     |       |
|-----|--------------|------------------------|------------------------|----------------------------|---------------------------|---------------------|-------|
|     | D (Å)        | Overlap-S <sup>2</sup> | D (Å)                  | $\sigma_{\text{hole}}$ (Å) | $\sigma_{\text{ele}}$ (Å) | H <sub>CT</sub> (Å) | t (Å) |
| S1  | 3.81         | 0.038                  | 3.78                   | 0.03                       | 2.89                      | 0.85                | 2.94  |
| S2  | 0.94         | 0.140                  | 0.91                   | 0.03                       | 3.27                      | 0.90                | 0.01  |
| S3  | 2.26         | 0.120                  | 2.22                   | 0.03                       | 3.32                      | 0.96                | 1.27  |
| S17 | 2.76         | 0.003                  | 2.72                   | 0.03                       | 3.80                      | 1.03                | 1.69  |
| S18 | 2.47         | 0.005                  | 2.43                   | 0.03                       | 3.54                      | 0.92                | 1.51  |

358

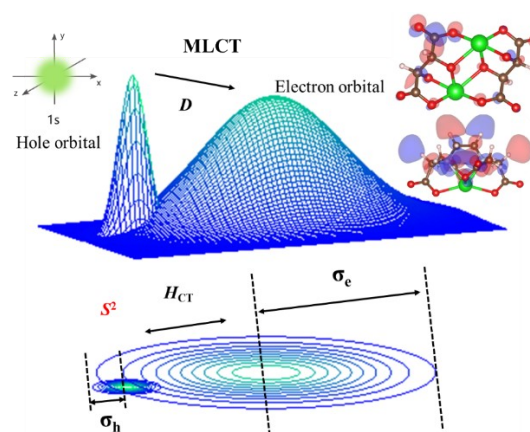

359

360 **Figure S14** Scheme of the charge transfer transition.

363 **References**

- 364 1. W. Zhong, Z. Yin, L. Wang, L. Yan and C. Jing, *Chemosphere*, 2022, **301**,  
365 134682.
- 366 2. G. Jansen and B. A. Hess, *Phys. Rev. A*, 1989, **39**, 6016-6017.
- 367 3. R. A. Kendall and H. A. Fruchtl, *Theor. Chem. Acc.*, 1997, **97**, 158-163.
- 368 4. S. Hirata and M. Head-Gordon, *Chem. Phys. Lett.*, 1999, **314**, 291-299.
- 369 5. Z. Y. Liu, T. Lu and Q. X. Chen, *Carbon*, 2020, **165**, 461-467.
- 370 6. X. Tang, L. S. Cui, H. C. Li, A. J. Gillett, F. Auras, Y. K. Qu, C. Zhong, S. T. E.  
371 Jones, Z. Q. Jiang, R. H. Friend and L. S. Liao, *Nat. Mater.*, 2020, **19**, 1332-  
372 1338.
- 373 7. T. Lu and F. W. Chen, *J. Comput. Chem.*, 2012, **33**, 580-592.
- 374
